# Supplementary material for: Synthesis of N-doped carbon coated metal oxide nanoparticles for enhanced Li-ion storage ability
Source: Royal Society of Chemistry journal article supplement (doi:10.1039/c3ra42241k), 2013-01-01
Supplement: c3ra42241k.pdf [file c3ra42241k.pdf]

*Supporting information for*

**Synthesis of N-doped carbon coated metal oxide nanoparticles for  
enhanced Li-ion storage ability**

Hai Ming,<sup>‡a,b,c</sup> Jun Ming,<sup>‡d</sup> Xiaowei Li,<sup>a</sup> Qun Zhou,<sup>b</sup> Lingling Jin,<sup>a,b</sup> Yu Fu,<sup>a,b</sup> Jason Adkins,<sup>a</sup> Zhenhui Kang,<sup>c\*</sup> and Junwei Zheng<sup>a,b\*</sup>

<sup>a</sup>*Institute of Chemical Power Sources, Soochow University, Suzhou 215006 (P. R. China). E-mail: [jwzheng@suda.edu.cn](mailto:jwzheng@suda.edu.cn);*

<sup>b</sup>*College of Chemistry, Chemical Engineering and Materials Science, Soochow University, Suzhou 215123, PR China;*

<sup>c</sup>*Institute of Functional Nano & Soft Materials (FUNSOM) and Jiangsu Key Laboratory for Carbon Based Functional Materials & Devices, Soochow University, Suzhou, Jiangsu 215123, People's Republic of China;. E-mail: [zhkang@suda.edu.cn](mailto:zhkang@suda.edu.cn);*

<sup>d</sup>*Department of Energy Engineering, Hanyang University, Seoul, 133-791, Republic of Korea*

## Material and Characterization

### Preparation of $\text{Fe}_3\text{O}_4@\text{CN}_y$ and $\text{CoO}_x@\text{CN}_y$

All chemicals were used as received without further purification. Chitosan (purchased from Alfa Aesar Co. Ltd.), placed parallel with a dosage of 1.25 g, were dissolved into acetic acid (HAc, 25 mL) and  $\text{H}_2\text{O}$  (75 mL) mixed solution, named solution A. Later, 8.08 g  $\text{Fe}(\text{NO}_3)_3 \cdot 9\text{H}_2\text{O}$  added into solution A under vigorous stirring, and then a claybank colloid solution appeared in the reactor. The colloid solution was air dried at 353 K for 24 h. After that, the products were calcined at 773 K for 0.5 h with a heating rate of  $2 \text{ K min}^{-1}$  under the nitrogen flow. Finally, black N-doped encapsulated  $\text{Fe}_3\text{O}_4$  nanoparticles (i.e.,  $\text{Fe}_3\text{O}_4@\text{CN}_y\text{-500-N}_2$ ) were obtained. Varying the final calcination atmosphere to air or temperature to 673 and 873 K, the samples of  $\text{Fe}_3\text{O}_4@\text{CN}_y\text{-500-air}$ ,  $\text{Fe}_3\text{O}_4@\text{CN}_y\text{-400-N}_2$  and  $\text{Fe}_3\text{O}_4@\text{CN}_y\text{-600-N}_2$  were obtained. To prepare the material of  $\text{CoO}_x@\text{CN}_y\text{-500-N}_2$ , 5.82 g  $\text{Co}(\text{NO}_3)_2 \cdot 6\text{H}_2\text{O}$  was used under the same synthesis process.

### Electrode fabrication

The electrochemical rate-capability and cycling performance of samples were carried out with coin-shaped cells using a metallic lithium film as both the counter and reference electrodes. The mass of the Li metal was typically 15 mg, whereas the mass of samples ranged from 3 mg to 6 mg. The anode was prepared by a coating method, a slurry of 80% (weight percent) active material (the blue powder was ground and sieved before used), 10% conducting carbon black (Super P), and 10% polyvinylidene fluoride (PVDF) binder homogeneously mixed in N-methyl pyrrolidinone (NMP) were prepared into viscous slurries for efficient deposition. After the slurries was stirring on a magnetic stirring apparatus until the powder mixed uniformity. The slurries was coated on the copper foil by an automatic film editor, then dried in a vacuum oven at 393 K for 12 h, and cut into circular sheet. Then the

sheet was dried in a vacuum oven at 393 K for 12 h again. The cells were assembled into CR2016 coin cells in a glove box filled with pure argon, in which the moisture and oxygen was strictly controlled to less than 1 ppm. Microporous polypropylene film (Celgard2400) was used as the separator. The electrolyte was 1.0 mol L<sup>-1</sup> LiPF<sub>6</sub> in a mixture of diethyl carbonate (DEC) and ethylene carbonate (EC) in the ratio of 1:1(w : w). The cells had a configuration of Li metal (-) | electrolyte | Sample (+), with a liquid electrolyte.

### Characterization

The obtained products were characterized by X-ray powder diffraction (XRD) using a X 'Pert-ProMPD (Holand) D/max-γA X-ray diffractometer with Cu Kα radiation ( $\lambda = 0.154178$  nm). The XRD measurement conditions: the scanning current is 40 mA, the scanning voltage is 40 KV, the scanning step is 0.026 ° and the scanning rate is 0.2626 ° s<sup>-1</sup>. Scanning electron microscopy (SEM) images and EDX were taken on a FEI-quanta 200F scanning electron microscope with acceleration voltage of 30 kV. Transmission electron micrographs (TEMs) were taken on a FEI-Tecnai F20 (200 kV) transmission electron microscope (FEI). X-ray Photoelectron Spectroscopy (XPS) was obtained by using a KRATOS Axis ultra-DLD X-ray photoelectron spectrometer with a monochromatised Mg Kα X-ray ( $h\nu = 1283.3$  eV). XPS samples were prepared by drying a dispersion of micro-crystals on a piece of silicon wafer. Nitrogen adsorption-desorption isotherms were obtained using a ASAP2050 (Micromeritics Instrument Corp.) surface area & porosity Analyzer at 77 K. The specific surface area was calculated by the Brunauer-Emmett-Teller (BET) method. Thermogravimetric analysis (TGA) was carried out under a flow of air with a temperature ramp of 5 °C min<sup>-1</sup>. The electrochemical properties of products were tested in CR2016 coin cells. All the measurements were controlled and recorded automatically by the LAND CT2001C charge-discharge detector (China, Wu han). Cyclic voltammetry (CV) tests were performed over the potential range of 0.01 - 3.00 V using a CHI660B electrochemical workstation.

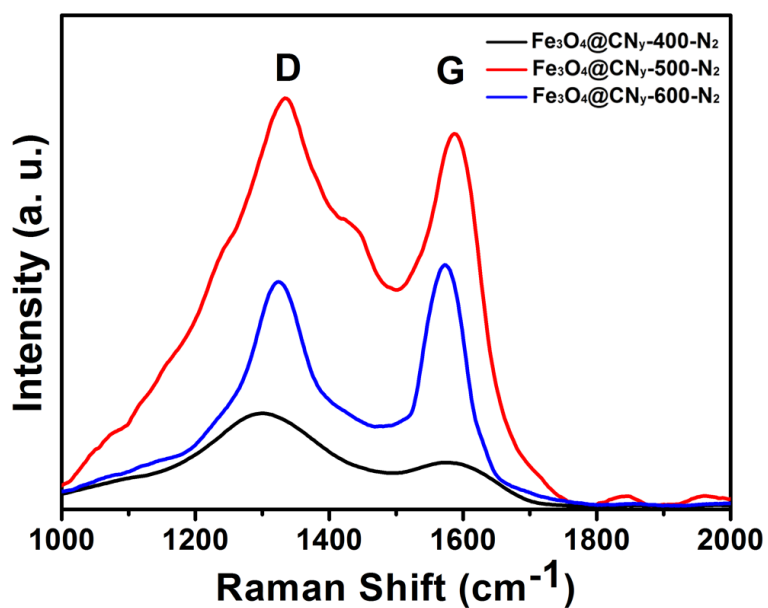

**Fig. S1** Raman spectra of Fe<sub>3</sub>O<sub>4</sub>@CN<sub>y</sub>-N<sub>2</sub> (400, 500, 600) after treated with HCl.

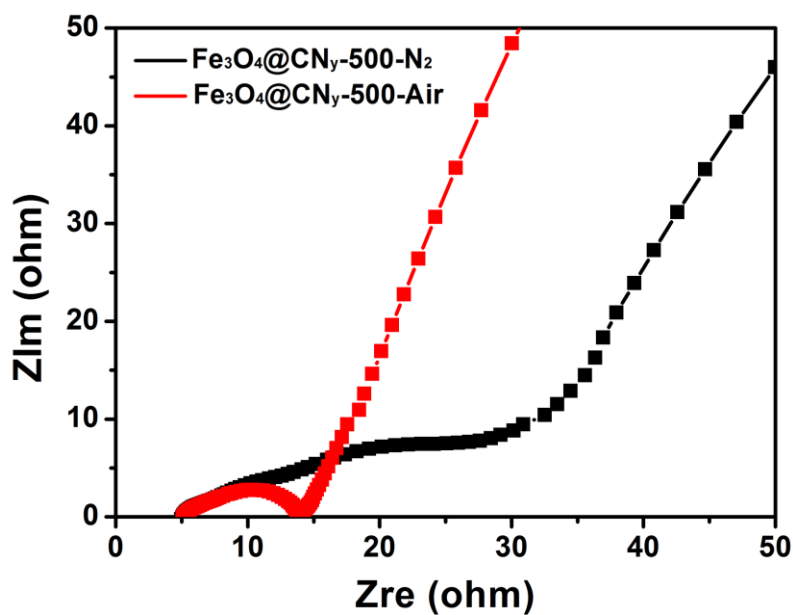

**Fig. S2** Nyquist plots of Fe<sub>3</sub>O<sub>4</sub>@CN<sub>y</sub>-500-N<sub>2</sub> and Fe<sub>3</sub>O<sub>4</sub>@CN<sub>y</sub>-500-air electrodes after cycling at the current density of 50 mA g<sup>-1</sup>.

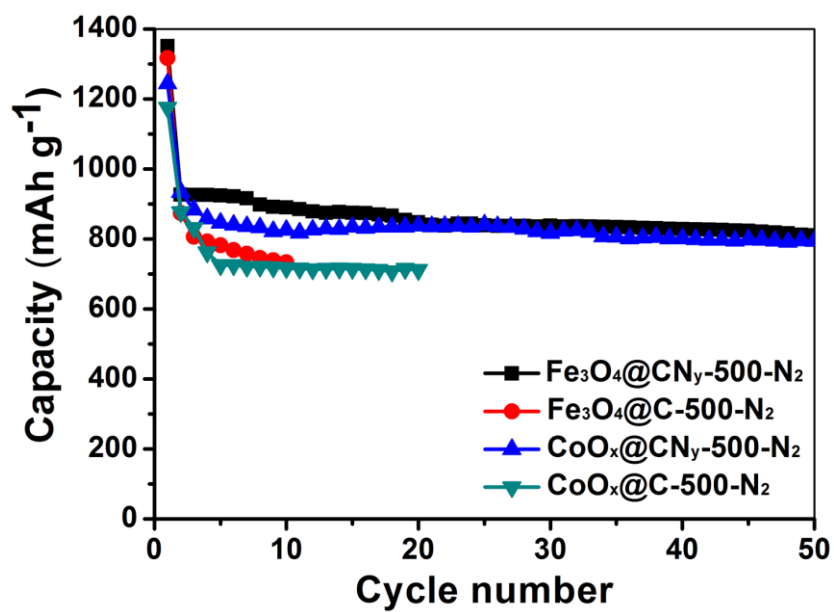

**Fig. S3** Cycling performances at the current density of 50 mA g<sup>-1</sup> of Fe<sub>3</sub>O<sub>4</sub>@CN<sub>y</sub>-500-N<sub>2</sub>, Fe<sub>3</sub>O<sub>4</sub>@C-500-N<sub>2</sub>, CoO<sub>x</sub>@CN<sub>y</sub>-500-N<sub>2</sub> and CoO<sub>x</sub>@C-500-N<sub>2</sub> electrodes.
